# Supplementary material for: Opposing roles for Bmp signalling during the development of electrosensory lateral line organs
Source: eLife. 2025 Jan 2;14:e99798. doi: 10.7554/eLife.99798 (PMC11936418; doi:10.7554/eLife.99798)
Supplement: Supplementary file 1. — For each sgRNA mix, the table shows the number of independent batches, markers used for analysis, percentage with a phenotype, and genotyping information including genotyping primer sequences. Note: Tyr crispant data are shared between this study and Minařík et al., 2024b. Tyr sgRNAs 7 and 8 were designed and published by Stundl et al., 2022 as their tyr sgRNA 3 and tyr sgRNA 4, respectively. [file elife-99798-supp1.xlsx]

## Sheet: Sheet1
	Target gene	Phenotype analysed	sgRNA mix	Number of independent batches	Batch numbers analysed	Marker used	Number with phenotype	Number analysed	Percentage with phenotype	sgRNAs confirmed to disrupt target	Genotyping primer - forward	Genotyping primer - reverse
	Bmp5	AO number	1+2+3	1	21	Cacna1d	16	41	0.390244	1, 3	GGAACACAGTCGCTGAAGTG	GTTGCATACATGCCCAGATG
			1+4	1	31	Cacna1d	9	39	0.230769	1, 4	GGAACACAGTCGCTGAAGTG	GTTGCATACATGCCCAGATG
			1+4	1	31	Kcnab3	1	6	0.166667	Not genotyped	n/a	n/a
			2+3	1	31	Cacna1d	28	36	0.777778	2, 3	GGAACACAGTCGCTGAAGTG	GTTGCATACATGCCCAGATG
			2+3	1	31	Kcnab3	5	7	0.714286	2, 3	GGAACACAGTCGCTGAAGTG	GTTGCATACATGCCCAGATG
	Tyr	AO number	1+2	3	14, 16, 18	Cacna1d	0	8	0	1, 2	GCGTCTCTCCAGTCCCAATA	AGAGAGAAGTGGCCCTTGGT
			1+2	2	16, 18	Kcnab3	0	8	0	1, 2	GCGTCTCTCCAGTCCCAATA	AGAGAGAAGTGGCCCTTGGT
			1+2+3+4	1	1	Kcnab3	0	1	0	Not genotyped	n/a	n/a
			5+6	2	6, 8	Kcnab3	0	6	0	Not genotyped	n/a	n/a
			7+8	2	27, 31	Cacna1d	0	16	0	Not genotyped	n/a	n/a
			7+8	2	27, 31	Kcnab3	0	19	0	Not genotyped	n/a	n/a
		Pigmentation	1+2	5	6, 11, 14, 16, 18	Melanin	41	63	0.650794	1, 2	GCGTCTCTCCAGTCCCAATA	AGAGAGAAGTGGCCCTTGGT
			1+2+3+4	1	1	Melanin	4	15	0.266667	Not genotyped	n/a	n/a
			5+6	2	6, 8	Melanin	0	24	0	Not genotyped	n/a	n/a
			7+8	3	15, 27, 31	Melanin	18	33	0.545455	Not genotyped	n/a	n/a
